# Supplementary material for: Antioxidant Activities in Kenaf (Hibiscus cannabinus) Shoots during Growth Stages and Destination of Chlorogenic Acid and Kaempferol Glycosides
Source: MDPI journal article supplement (doi:10.3390/antiox13050532), 2024-04-26
Supplement: s1 [file s1]

**Table S1.** The equation, correlation coefficient, LOD and LOQ for each phenolic standard

| Phenolics | Equation        | R <sup>2</sup> | LOD (µg/ml) | LOQ (µg/ml) |
|-----------|-----------------|----------------|-------------|-------------|
| CGA       | y=17278x-8771.6 | 0.9987         | 3.79        | 11.47       |
| Kfr       | y=10424x-4417.7 | 0.999          | 3.45        | 10.45       |

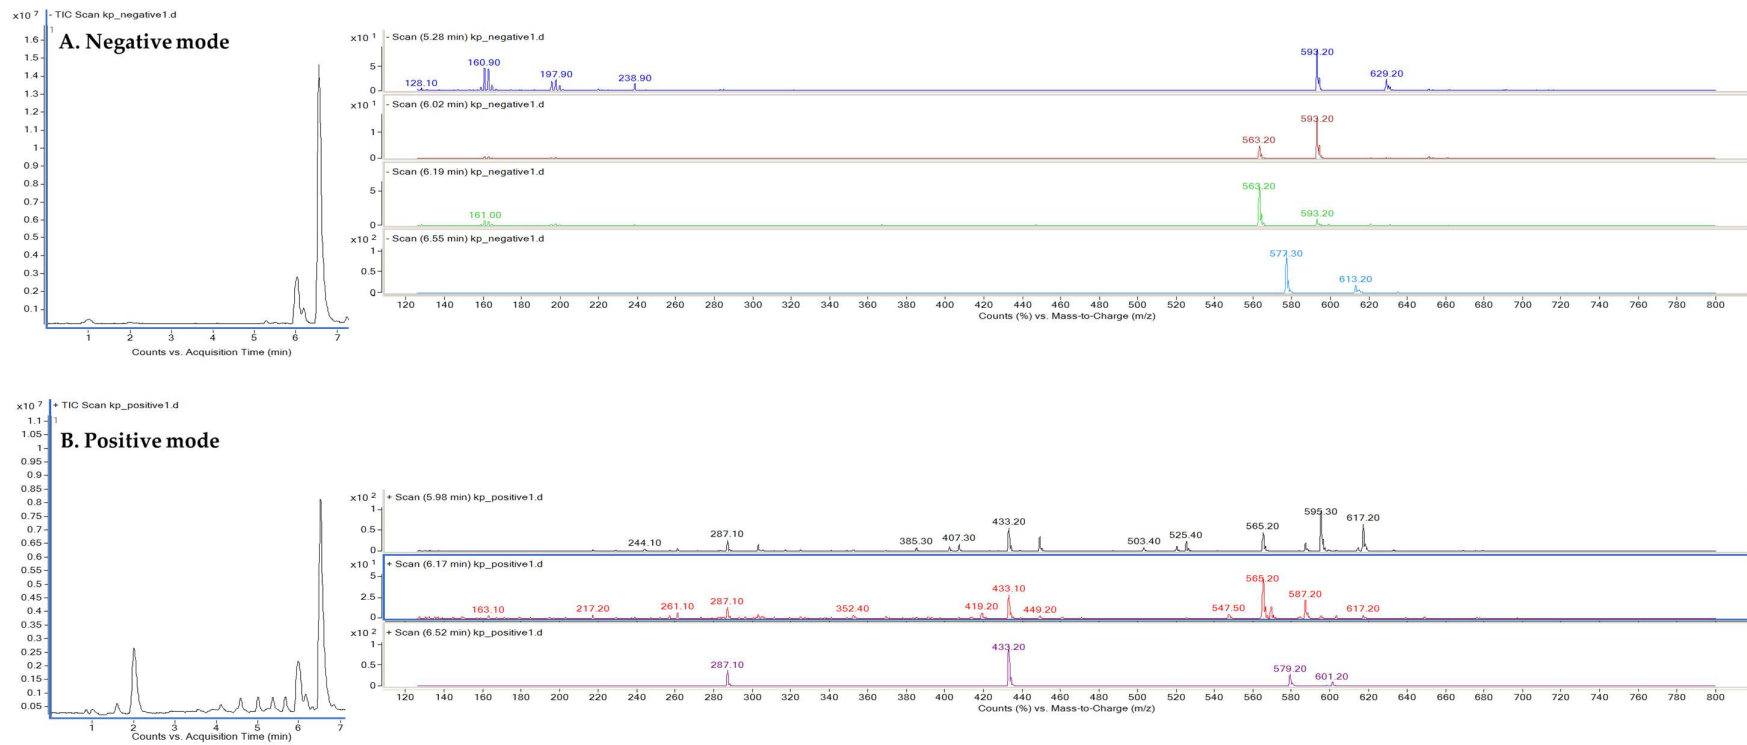

**Figure S1.** LC-MS/MS chromatograms of kenaf extracts.

**Table S2.** Correlation coefficients between antioxidant activities and metabolite groups assembled with kenaf leaves.

|             | CGA     | Kf-gly 1 | Kf-gly 2 | Kf-rham-xyl | Kfr      | TFC     | TPC      | TPSC    | DPPH     | ABTS     | FRAP |
|-------------|---------|----------|----------|-------------|----------|---------|----------|---------|----------|----------|------|
| CGA         | 1       |          |          |             |          |         |          |         |          |          |      |
| Kf-gly 1    | 0.168ns | 1        |          |             |          |         |          |         |          |          |      |
| Kf-gly 2    | 0.480ns | 0.929*** | 1        |             |          |         |          |         |          |          |      |
| Kf-rham-xyl | 0.361ns | 0.976*** | 0.974*** | 1           |          |         |          |         |          |          |      |
| Kfr         | 0.281ns | 0.968*** | 0.966*** | 0.959***    | 1        |         |          |         |          |          |      |
| TFC         | 0.821** | -0.234ns | 0.080ns  | -0.024ns    | -0.162ns | 1       |          |         |          |          |      |
| TPC         | 0.598*  | 0.278ns  | 0.526ns  | 0.425ns     | 0.341ns  | 0.700*  | 1        |         |          |          |      |
| TPSC        | 0.522ns | -0.294ns | 0.013ns  | -0.199ns    | -0.056ns | 0.432ns | 0.283ns  | 1       |          |          |      |
| DPPH        | 0.733** | 0.202ns  | 0.507ns  | 0.367ns     | 0.306ns  | 0.767** | 0.960*** | 0.473ns | 1        |          |      |
| ABTS        | 0.665*  | 0.231ns  | 0.520ns  | 0.380ns     | 0.334ns  | 0.705*  | 0.971*** | 0.452ns | 0.992*** | 1        |      |
| FRAP        | 0.693*  | 0.481ns  | 0.736**  | 0.623*      | 0.566ns  | 0.596*  | 0.908*** | 0.322ns | 0.924*** | 0.923*** | 1    |

Tukey's HSD test, \* indicates  $p < 0.05$ , \*\* indicates  $p < 0.01$ , \*\*\* indicates  $p < 0.001$ , and ns indicates no significance.

**Table S3.** Correlation coefficients between antioxidant activities and metabolite groups assembled with kenaf stems.

|      | CGA      | Kfr       | TFC      | TPC      | TPSC    | DPPH     | ABTS     | FRAP |
|------|----------|-----------|----------|----------|---------|----------|----------|------|
| CGA  | 1        |           |          |          |         |          |          |      |
| Kfr  | -0.6753* | 1         |          |          |         |          |          |      |
| TFC  | 0.981*** | -0.738**  | 1        |          |         |          |          |      |
| TPC  | 0.980*** | -0.767**  | 0.993*** | 1        |         |          |          |      |
| TPSC | 0.451ns  | -0.655*   | 0.575ns  | 0.541ns  | 1       |          |          |      |
| DPPH | 0.980*** | -0.784**  | 0.970*** | 0.986*** | 0.484ns | 1        |          |      |
| ABTS | 0.958*** | -0.833*** | 0.979*** | 0.991*** | 0.600*  | 0.985*** | 1        |      |
| FRAP | 0.960*** | -0.819**  | 0.972*** | 0.977*** | 0.598*  | 0.976*** | 0.984*** | 1    |

Tukey's HSD test, \* indicates  $p < 0.05$ , \*\* indicates  $p < 0.01$ , and \*\*\* indicates  $p < 0.001$ .
